# Supplementary material
Source: publisher figshare collection journal article supplement (https://tandf.figshare.com/ndownloader/files/17663723)
Supplement: Supplementary file 1 [file 17663723]

**Supplementary information**

**Preparation of** **sterile long-acting injectable medroxyprogesterone acetate microcrystals** **based on anti-solvent precipitation and crystal habit control**


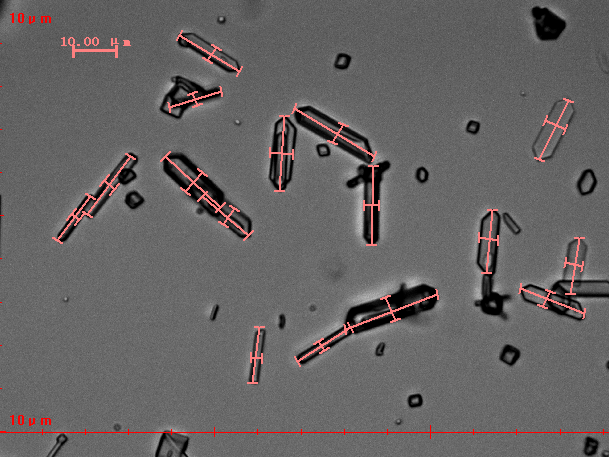


**Fig. S1.** Dimensional measurement under an electron microscope.

**
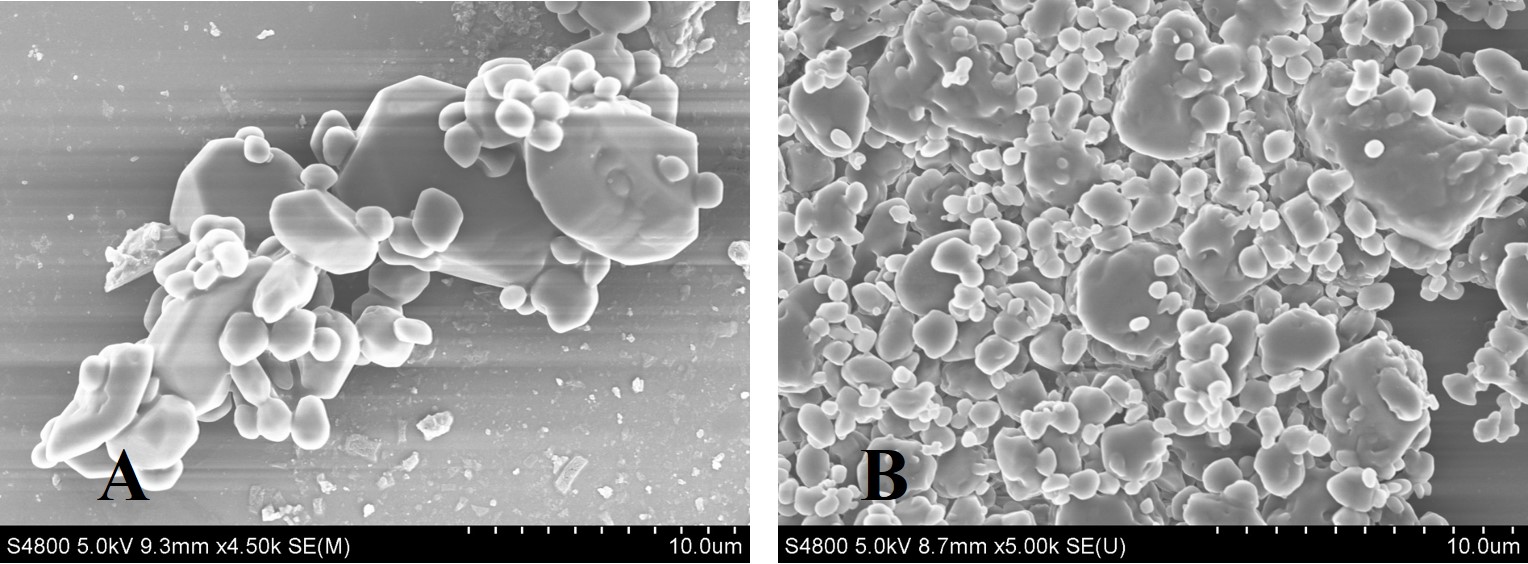
**

**Fig. S2.** SEM image of MPA-DP (A) and MPA-API (B)
